# Supplementary figures and images for: Valeriana wallichii root extract as a green & sustainable corrosion inhibitor for mild steel in acidic environments: experimental and theoretical study
Source: Royal Society of Chemistry journal article supplement (doi:10.1039/c8qm00120k), 2018-01-01

### Supplementary data

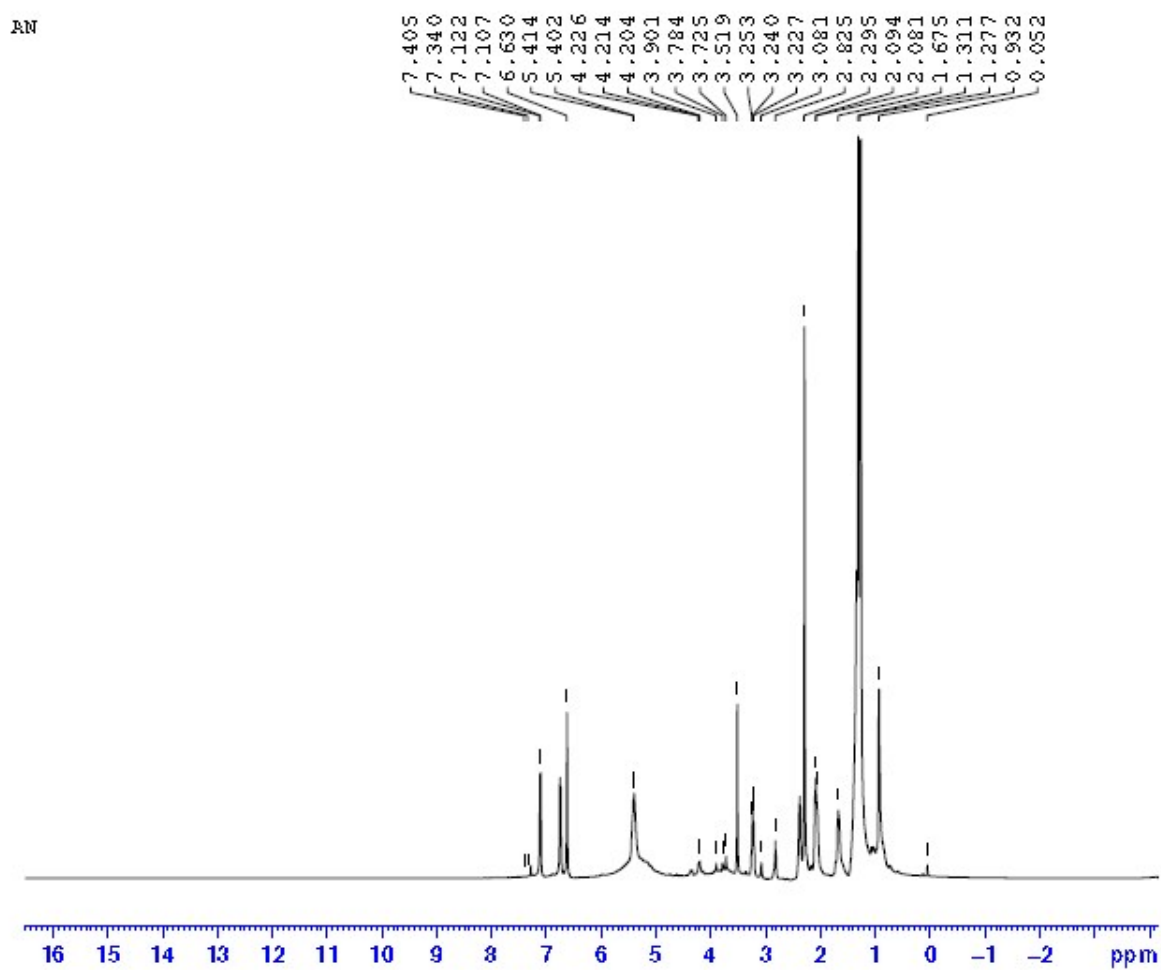

**Fig. S1:**  $^1\text{H}$  NMR spectrum of pure *Valeriana willichii* extract.

Supplement: c8qm00120k1.pdf [file c8qm00120k1.pdf]
